# Supplementary material for: Intranasal carbetocin reduces hyperphagia in individuals with Prader-Willi syndrome
Source: JCI journal article supplement (doi:10.1172/jci.insight.98333), 2018-06-20
Supplement: sd1 [file 1]

## SUPPLEMENTAL TABLE

**Table S1.** Least squares mean change from baseline in primary and secondary efficacy outcome measures on day 8 and study end (visit 4, day 15), carbetocin versus placebo

| Outcome measure                    | Day 8          |         | Day 15         |         |
|------------------------------------|----------------|---------|----------------|---------|
|                                    | LS Mean Change | P Value | LS Mean Change | P Value |
| HPWSQ-R total score                | −5.2           | 0.0632  | −6.7           | 0.0290  |
| Behavior                           | −1.9           | 0.1153  | −2.0           | 0.1172  |
| Drive                              | −2.1           | 0.0625  | −1.6           | 0.1436  |
| Severity                           | −1.1           | 0.0572  | −1.5           | 0.0248  |
| HPWSQ-R-C total score              | −10.2          | 0.0017  | −10.5          | 0.0014  |
| Behavior                           | −5.4           | 0.0017  | −4.3           | 0.0068  |
| Drive                              | −3.4           | 0.0019  | −2.6           | 0.0340  |
| Severity                           | −1.7           | 0.0061  | −2.2           | 0.0014  |
| CGI-I                              | −0.9           | 0.0162  | −0.8           | 0.0233  |
| CY-BOCS                            | −2.7           | 0.0956  | −6.2           | 0.0047  |
| Food domain score of Reiss Profile | −3.0           | 0.0184  | −4.4           | 0.0132  |

CGI-I, Clinical Global Impressions–Improvement; CY- BOCS, Children’s Yale-Brown Obsessive Compulsive Scale; HPWSQ-R, parent/caregiver-rated Hyperphagia in Prader-Willi Syndrome Questionnaire-Responsiveness; HPWSQ-R-C, clinician-rated Hyperphagia in Prader-Willi Syndrome Questionnaire-Responsiveness; LS, least squares.

## SUPPLEMENTAL FIGURES

**Figure S1.** Change from baseline in HPWSQ-C total score at day 8 and study end (visit 4, day 15). The analysis included all participants with an HPWSQ-C assessment at baseline, day 8, and/or day 15 and was performed using an ANCOVA model with treatment group and study site as fixed effects.

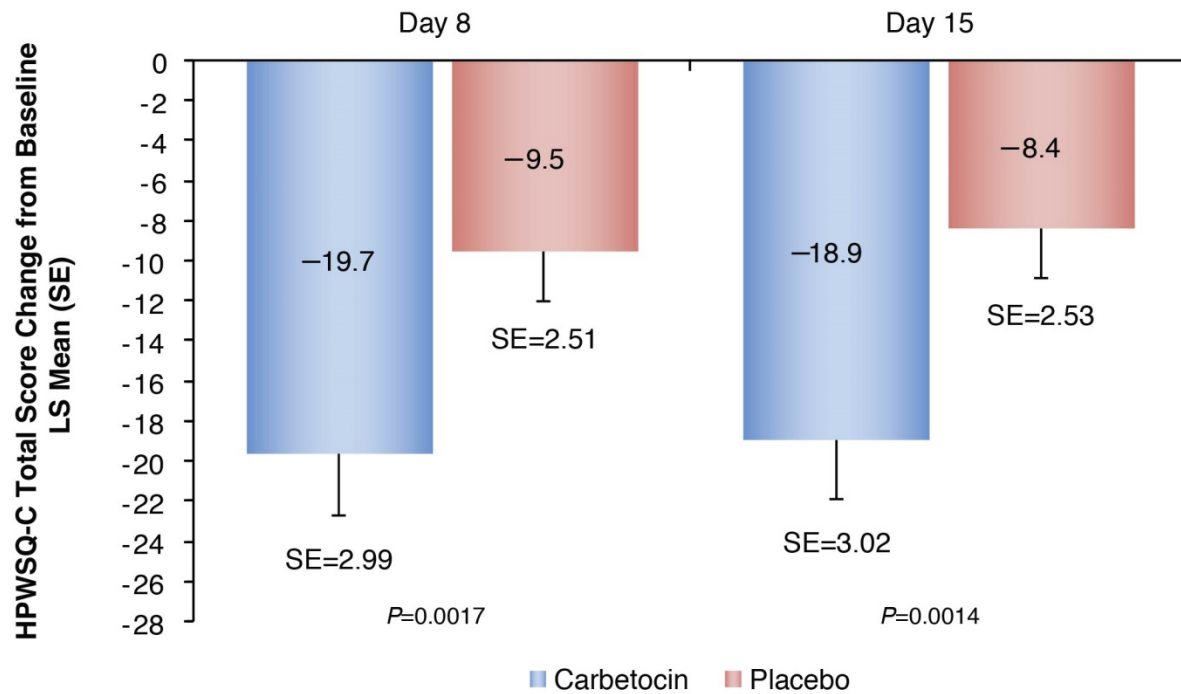

ANCOVA, analysis of covariance; HPWSQ-C, clinician-rated Hyperphagia in Prader-Willi Syndrome Questionnaire-Responsiveness; LS, least squares; SE, standard error.

**Figure S2.** Change from baseline in CY-BOCS total score at day 8 and study end (visit 4, day 15). The analysis included all participants with a CY-BOCS assessment at baseline, day 8, and/or day 15 and was performed using an ANCOVA model with treatment group and study site as fixed effects.

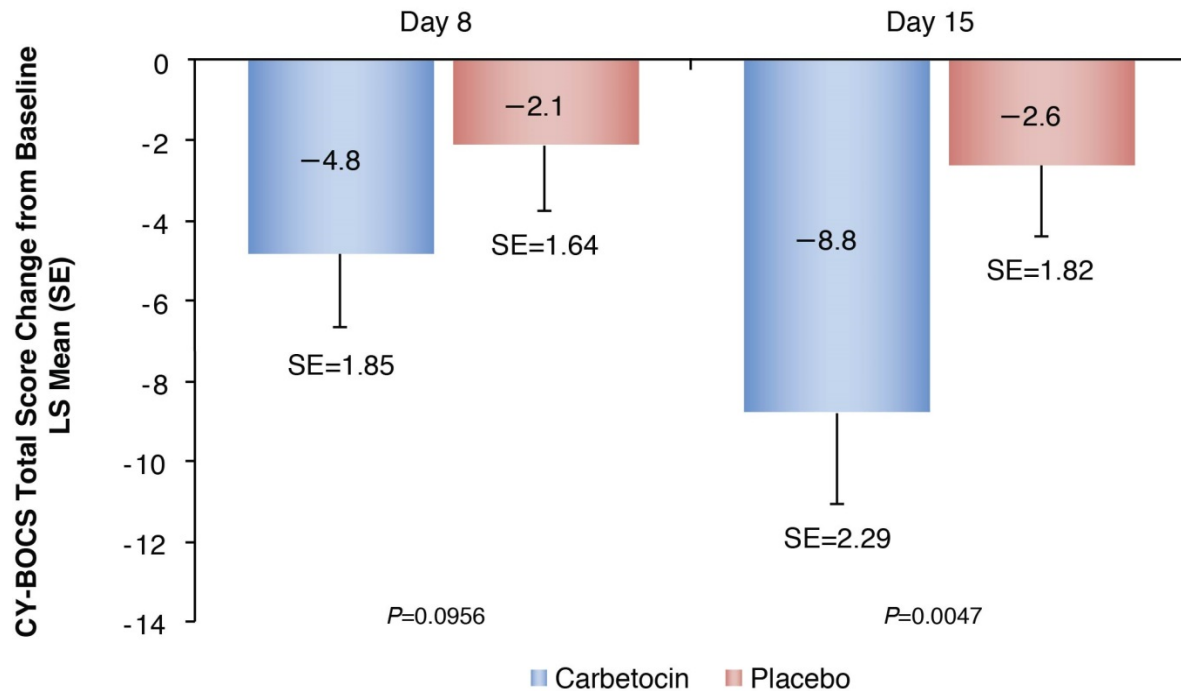

ANCOVA, analysis of covariance; CY-BOCS, Children's Yale-Brown Obsessive Compulsive Scale; LS, least squares; SE, standard error.

**Figure S3.** Change from baseline in CGI-I total score at day 8 and study end (visit 4, day 15). The analysis included all participants with a CGI-I assessment at baseline, day 8, and/or day 15 and was performed using an ANCOVA model with treatment group and study site as fixed effects.

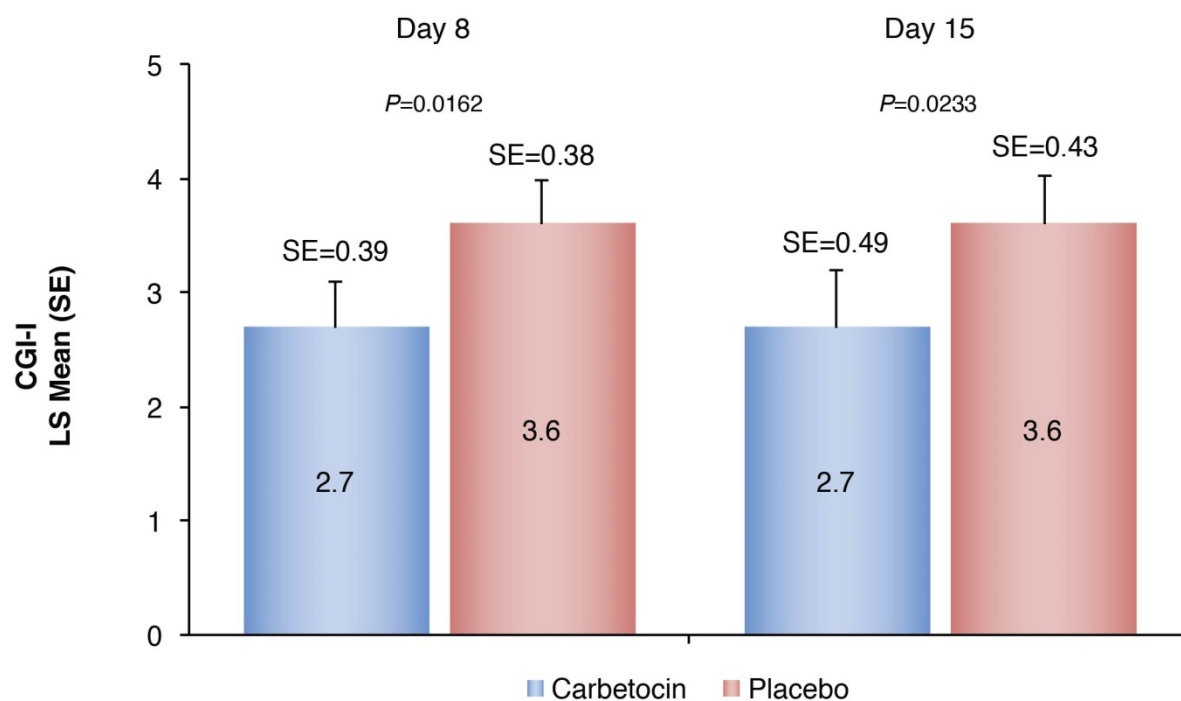

ANCOVA, analysis of covariance; CGI-I, Clinical Global Impression–Improvement; LS, least squares; SE, standard error.

**Figure S4.** Change from baseline in Food domain score of Reiss Profile total score at day 8 and study end (visit 4, day 15). The analysis included all participants with a food domain score of the Reiss Profile assessment at baseline, day 8, and/or day 15 and was performed using an ANCOVA model with treatment group and study site as fixed effects.

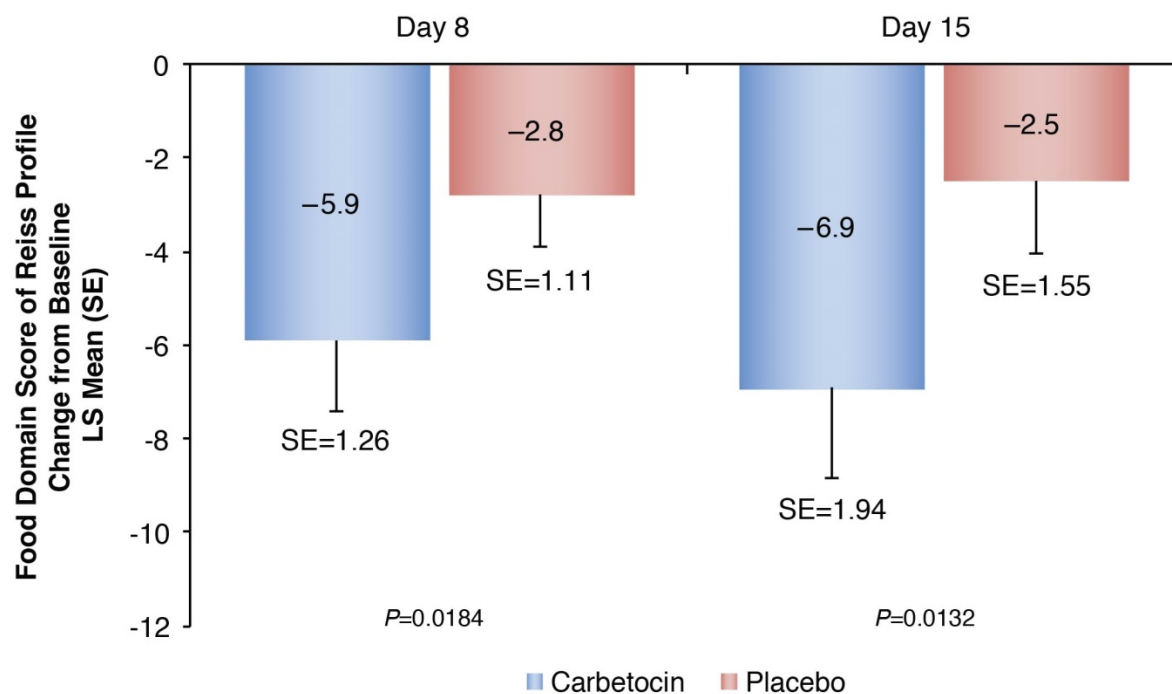

ANCOVA, analysis of covariance; LS, least squares; SE, standard error.
